# Supplementary material for: The development of a highly conductive PEDOT system by doping with partially crystalline sulfated cellulose and its electric conductivity
Source: Royal Society of Chemistry journal article supplement (doi:10.1039/c5tc02074c), 2015-01-01
Supplement: c5tc02074c1.pdf [file c5tc02074c1.pdf]

## Electronic Supplementary Information (ESI)

### **Development of highly conductive PEDOT system by doping with partially crystalline sulfated cellulose and their electric conductivity**

by Maki Horikawa, Takanori Fujiki, Tomohiro Shirosaki, Naoya Ryu, Hideo Sakurai, Shoji Nagaoka<sup>†</sup>, Hirotaka Ihara

#### Contents

1. Particle size distribution of PEDOT/CS and PEDOT/PSS particles by DLS
2. Thickness and their electric conductivity of PEDOT thin films obtained from PEDOT/CS particles in H<sub>2</sub>O and H<sub>2</sub>O /ethanol dispersion

1. Particle size distribution of PEDOT/CS and PEDOT/PSS particles measured by DLS

Fig. S1 showed the particle size distributions of PEDOT/CS particles and PEDOT/PSS particles measured by DLS.

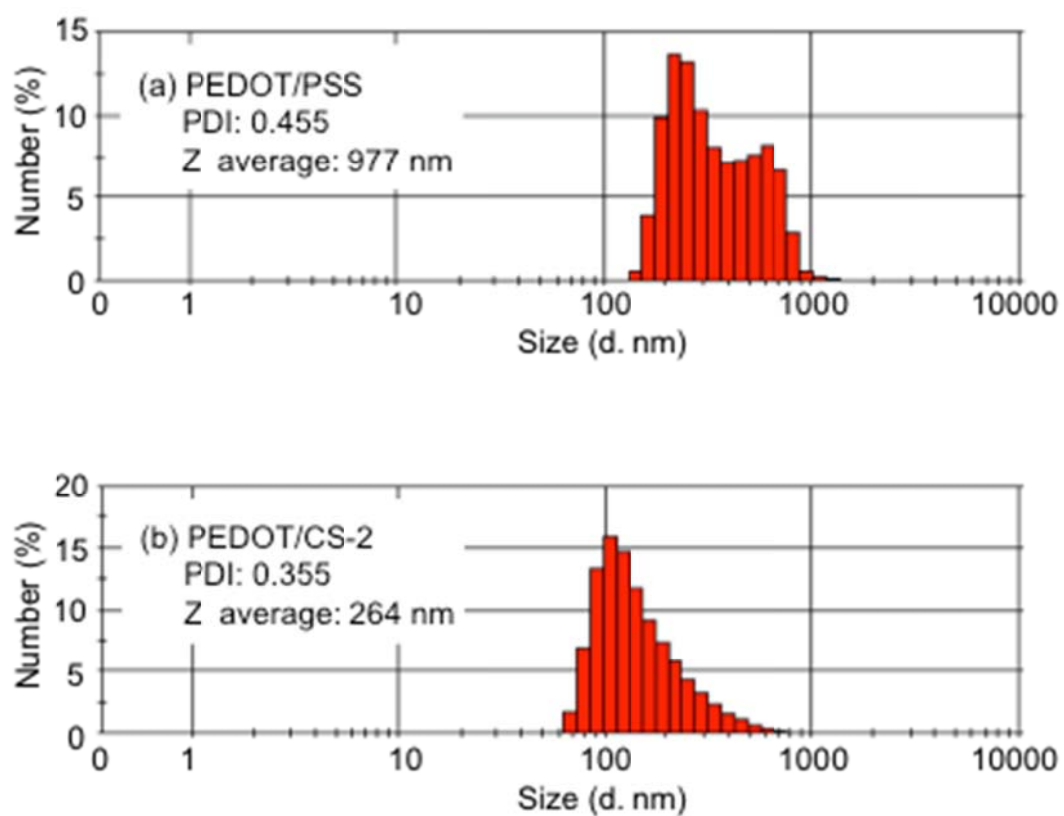

Fig. S1 Particle diameter distributions of PEDOT/PSS and PEDOT/CS-2.

## 2. Thickness and their electric conductivity of PEDOT thin films obtained from PEDOT/CS particles in H<sub>2</sub>O and H<sub>2</sub>O /ethanol dispersion

Table S1 summarizes the surface resistance and film thickness of these samples, as well as the volume resistance and electrical conductivity of the PEDOT thin films prepared from PEDOT/CS particles H<sub>2</sub>O/ethanol mixed solution dispersion. The thickness of film obtained from H<sub>2</sub>O dispersion (Table S1) became larger than that of the film obtained from H<sub>2</sub>O/ethanol mixed solution dispersion (Table 4), because the mean diameter of PEDOT/CS particles in H<sub>2</sub>O/ethanol mixed solution is larger than those in H<sub>2</sub>O, as estimated from DLS of Fig. S1. Their electrical conductivities became higher slightly, with increasing of thickness of film for same type of PEDOT/CS (for example, PEDOT/CS-5: from 32 nm,  $0.014 \times 10^{-3} \text{ S cm}^{-1}$  to 81 nm,  $0.029 \times 10^{-3} \text{ S cm}^{-1}$ ). Especially, the conductivities of CS-1, -2, -3, -4, and -5 showed tendency similar to Fig 4, as shown in Fig. S2.

Table S1 PEDOT thin films obtained from PEDOT/CS H<sub>2</sub>O and H<sub>2</sub>O/ethanol dispersion

| Sample     | t (nm)           |                          | $\rho \times 10^{-6} (\Omega/\text{sq.})$ |                          | $\sigma \times 10^3 (\text{S} \cdot \text{cm}^{-1})$ |                          |
|------------|------------------|--------------------------|-------------------------------------------|--------------------------|------------------------------------------------------|--------------------------|
|            | H <sub>2</sub> O | H <sub>2</sub> O/ethanol | H <sub>2</sub> O                          | H <sub>2</sub> O/ethanol | H <sub>2</sub> O                                     | H <sub>2</sub> O/ethanol |
| PEDOT/CS-1 | 79               | 88                       | 0.29                                      | 0.25                     | 436                                                  | 449                      |
| PEDOT/CS-2 | 59               | 63                       | 0.25                                      | 0.22                     | 576                                                  | 735                      |
| PEDOT/CS-3 | 44               | 96                       | 0.90                                      | 0.19                     | 253                                                  | 546                      |
| PEDOT/CS-4 | 53               | 100                      | 13.1                                      | 0.20                     | 14.0                                                 | 50.0                     |
| PEDOT/CS-5 | 32               | 81                       | 21500                                     | 4340                     | 0.014                                                | 0.029                    |

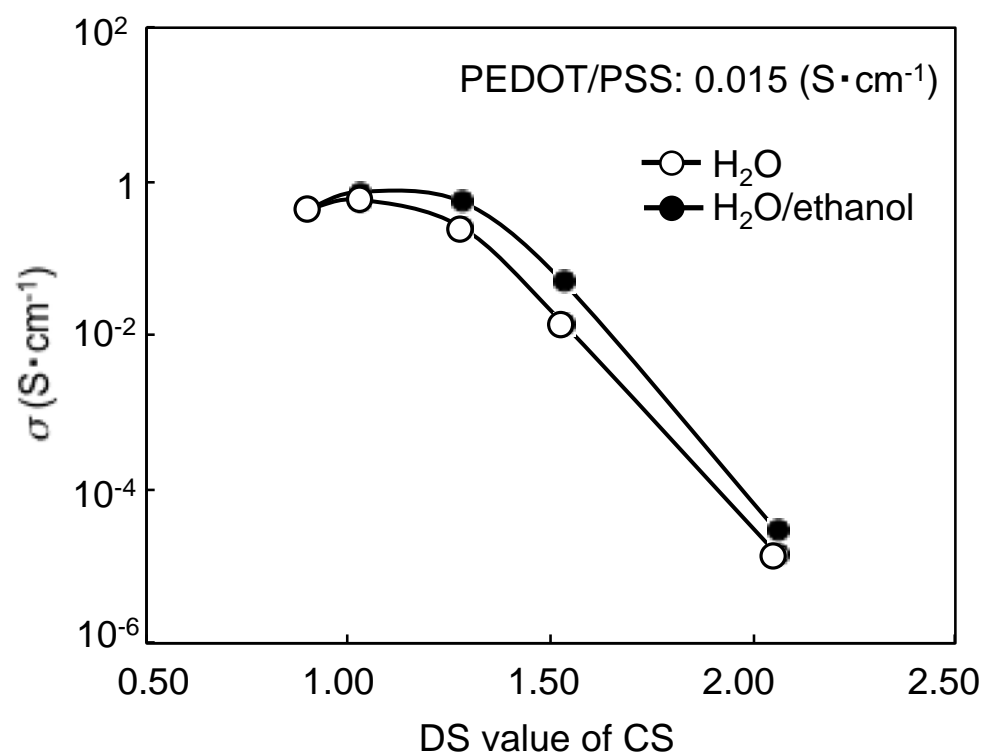

Fig. S2 Relationship between electrical conductivity and the degree of substitution of sulfuric groups. (○) H<sub>2</sub>O and (●) H<sub>2</sub>O/ethanol dispersion.
